# Supplementary material for: Vitamin B12 Ameliorates Pesticide-Induced Sociability Impairment in Zebrafish (Danio rerio): A Prospective Controlled Intervention Study
Source: MDPI journal article supplement (doi:10.3390/ani14030405), 2024-01-26
Supplement: s1 [file s1]

**Table S1 – Superoxide dismutase results**

| <b>NR.<br/>SAMPLE</b> | <b>UNTREATED GROUP</b> |              |              | <b>VITAMIN GROUP</b> |               |               | <b>PESTICIDE GROUP</b> |              |              | <b>MIXTURE GROUP</b> |              |              |
|-----------------------|------------------------|--------------|--------------|----------------------|---------------|---------------|------------------------|--------------|--------------|----------------------|--------------|--------------|
| 1                     | 3.546                  | 3.553        | 3.551        | 46.227               | 46.226        | 46.219        | 9.273                  | 9.272        | 9.269        | 1.556                | 1.553        | 1.55         |
| 2                     | 9.953                  | 9.956        | 9.952        | 39.776               | 39.771        | 39.764        | 4.25                   | 4.248        | 4.242        | 5.147                | 5.143        | 5.138        |
| 3                     | 3.859                  | 3.857        | 3.863        | 32.458               | 32.457        | 32.452        | 9.629                  | 9.628        | 9.624        | 2.992                | 2.988        | 2.984        |
| 4                     | 6.592                  | 6.607        | 6.606        | 45.91                | 45.9          | 45.87         | 9.604                  | 9.603        | 9.601        | 2.663                | 2.66         | 2.657        |
| 5                     | 7.604                  | 7.602        | 7.601        | 56.706               | 56.702        | 56.701        | 6.376                  | 6.373        | 6.369        | 4.814                | 4.811        | 4.809        |
| 6                     | 8.532                  | 8.527        | 8.524        | 36.564               | 36.562        | 36.56         | 7.604                  | 7.603        | 7.6          | 3.511                | 3.509        | 3.505        |
| 7                     | 9.305                  | 9.303        | 9.299        | 26.635               | 26.634        | 26.631        | 4.993                  | 4.992        | 4.989        | 1.943                | 1.94         | 1.937        |
| 8                     | 4.575                  | 4.575        | 4.558        | 53.904               | 53.903        | 53.9          | 3.881                  | 3.88         | 3.876        | 2.748                | 2.744        | 2.742        |
| 9                     | 3.94                   | 3.936        | 3.93         | 41.638               | 41.636        | 41.632        | 5.972                  | 5.97         | 5.965        | 3.6                  | 3.594        | 3.593        |
| 10                    | 4.782                  | 4.781        | 4.79         | 38.518               | 38.516        | 38.512        | 4.6311                 | 4.629        | 4.627        | 2.705                | 2.704        | 2.7          |
| 11                    | 6.61                   | 6.609        | 6.603        | 30.51                | 30.506        | 30.501        | 8.808                  | 8.8055       | 8.801        | 3.681                | 3.679        | 3.675        |
| 12                    | 8.593                  | 8.591        | 8.584        | 47.693               | 47.692        | 47.69         | 6.845                  | 6.84         | 6.838        | 1.832                | 1.831        | 1.824        |
| 13                    | 6.942                  | 6.937        | 6.935        | 53.831               | 53.829        | 53.826        | 7.799                  | 7.794        | 7.791        | 2.844                | 2.843        | 2.841        |
| 14                    | 8.725                  | 8.719        | 8.713        | 51.549               | 51.546        | 51.543        | 6.83                   | 6.829        | 6.827        | 5.742                | 5.741        | 5.7415       |
| 15                    | 7.807                  | 7.803        | 7.799        | 43.11                | 43.108        | 43.105        | 4.921                  | 4.919        | 4.915        | 4.449                | 4.446        | 4.445        |
| <b>MEAN</b>           | <b>6.758</b>           | <b>6.757</b> | <b>6.754</b> | <b>43.002</b>        | <b>42.999</b> | <b>42.994</b> | <b>6.761</b>           | <b>6.759</b> | <b>6.756</b> | <b>3.348</b>         | <b>3.346</b> | <b>3.343</b> |

**Table S2 – Glutathione peroxidase results**

| NR. SAMPLE  | UNTREATED GROUP |              |              | VITAMIN GROUP |              |              | PESTICIDE GROUP |              |              | MIXTURE GROUP |              |              |
|-------------|-----------------|--------------|--------------|---------------|--------------|--------------|-----------------|--------------|--------------|---------------|--------------|--------------|
| 1           | 0.237           | 0.236        | 0.234        | 1.893         | 1.892        | 1.889        | 0.123           | 0.122        | 0.117        | 0.115         | 0.114        | 0.11         |
| 2           | 0.131           | 0.13         | 0.129        | 0.484         | 0.483        | 0.48         | 0.151           | 0.15         | 0.149        | 0.111         | 0.11         | 0.109        |
| 3           | 0.395           | 0.392        | 0.391        | 0.797         | 0.795        | 0.792        | 0.106           | 0.104        | 0.102        | 0.131         | 0.129        | 0.127        |
| 4           | 0.14            | 0.139        | 0.132        | 0.45          | 0.44         | 0.41         | 1.027           | 1.024        | 1.02         | 0.204         | 0.202        | 0.201        |
| 5           | 0.612           | 0.611        | 0.609        | 2.606         | 2.605        | 2.602        | 0.183           | 0.182        | 0.178        | 0.108         | 0.106        | 0.102        |
| 6           | 0.562           | 0.56         | 0.558        | 2.02          | 2.016        | 2.015        | 0.212           | 0.21         | 0.209        | 0.119         | 0.118        | 0.113        |
| 7           | 0.354           | 0.353        | 0.351        | 0.821         | 0.819        | 0.816        | 0.174           | 0.173        | 0.171        | 0.174         | 0.173        | 0.17         |
| 8           | 1.044           | 1.043        | 1.041        | 1.715         | 1.714        | 1.709        | 0.124           | 0.122        | 0.121        | 0.725         | 0.722        | 0.72         |
| 9           | 0.255           | 0.252        | 0.251        | 1.31          | 1.309        | 1.304        | 0.171           | 0.17         | 0.168        | 0.192         | 0.191        | 0.187        |
| 10          | 0.196           | 0.195        | 0.189        | 2.461         | 2.46         | 2.458        | 0.094           | 0.091        | 0.088        | 0.163         | 0.162        | 0.16         |
| 11          | 0.263           | 0.262        | 0.26         | 0.903         | 0.901        | 0.899        | 0.105           | 0.102        | 0.101        | 0.131         | 0.13         | 0.126        |
| 12          | 1.045           | 1.044        | 1.043        | 2.824         | 2.822        | 2.82         | 0.081           | 0.08         | 0.076        | 0.121         | 0.12         | 0.119        |
| 13          | 0.236           | 0.235        | 0.229        | 1.66          | 1.65         | 1.62         | 0.135           | 0.132        | 0.129        | 0.116         | 0.114        | 0.11         |
| 14          | 1.031           | 1.029        | 1.028        | 3.517         | 3.514        | 3.511        | 0.104           | 0.102        | 0.099        | 0.103         | 0.102        | 0.1          |
| 15          | 0.412           | 0.411        | 0.41         | 1.824         | 1.821        | 1.82         | 0.113           | 0.111        | 0.109        | 0.102         | 0.1          | 0.099        |
| <b>MEAN</b> | <b>0.460</b>    | <b>0.459</b> | <b>0.457</b> | <b>1.685</b>  | <b>1.682</b> | <b>1.676</b> | <b>0.193</b>    | <b>0.191</b> | <b>0.189</b> | <b>0.174</b>  | <b>0.172</b> | <b>0.170</b> |

**Table S3 – Malondialdehyde results**

| <b>NR. SAMPLE</b> | <b>UNTREATED GROUP</b> |               |               | <b>VITAMIN GROUP</b> |               |               | <b>PESTICIDE GROUP</b> |               |               | <b>MIXTURE GROUP</b> |               |               |
|-------------------|------------------------|---------------|---------------|----------------------|---------------|---------------|------------------------|---------------|---------------|----------------------|---------------|---------------|
| 1                 | 16.371                 | 16.37         | 16.365        | 78.206               | 78.205        | 78.201        | 75.328                 | 75.325        | 75.322        | 10.434               | 10.433        | 10.429        |
| 2                 | 50.767                 | 50.766        | 50.761        | 51.433               | 51.43         | 51.429        | 27.559                 | 27.557        | 27.556        | 26.041               | 26.039        | 26.033        |
| 3                 | 20.693                 | 20.692        | 20.688        | 67.904               | 67.902        | 67.901        | 34.235                 | 34.232        | 34.23         | 25.49                | 25.489        | 25.482        |
| 4                 | 49.281                 | 49.278        | 49.274        | 49.941               | 49.94         | 49.938        | 28.606                 | 28.604        | 28.6          | 16.453               | 16.452        | 16.449        |
| 5                 | 24.084                 | 24.08         | 24.076        | 64.876               | 64.873        | 64.869        | 39.411                 | 39.409        | 39.405        | 13.25                | 13.247        | 13.246        |
| 6                 | 19.576                 | 19.574        | 19.57         | 49.511               | 49.509        | 49.505        | 68.306                 | 68.305        | 68.299        | 21.533               | 21.532        | 21.53         |
| 7                 | 36.812                 | 36.811        | 36.808        | 65.764               | 65.763        | 65.761        | 56.915                 | 56.914        | 56.912        | 15.431               | 15.429        | 15.428        |
| 8                 | 26.709                 | 26.707        | 26.701        | 47.905               | 47.902        | 47.901        | 49.626                 | 49.623        | 49.62         | 17.6                 | 17.599        | 17.598        |
| 9                 | 29.762                 | 29.761        | 29.759        | 68.607               | 68.606        | 68.604        | 79.922                 | 79.921        | 79.919        | 19.704               | 19.703        | 19.7          |
| 10                | 38.981                 | 38.978        | 38.975        | 59.872               | 59.869        | 59.865        | 39.508                 | 39.507        | 39.502        | 22.315               | 22.312        | 22.311        |
| 11                | 43.555                 | 43.552        | 43.549        | 76.023               | 76.021        | 76.017        | 81.312                 | 81.311        | 81.308        | 16.711               | 16.71         | 16.704        |
| 12                | 36.186                 | 36.183        | 36.179        | 69.804               | 69.803        | 69.802        | 53.413                 | 53.412        | 53.405        | 17.849               | 17.847        | 17.844        |
| 13                | 28.394                 | 28.391        | 28.388        | 58.314               | 58.311        | 58.309        | 41.593                 | 41.59         | 41.588        | 18.806               | 18.805        | 18.803        |
| 14                | 22.747                 | 22.746        | 22.741        | 59.8                 | 59.799        | 59.795        | 35.923                 | 35.922        | 36            | 21.308               | 21.307        | 21.303        |
| 15                | 44.594                 | 44.593        | 44.59         | 85.42                | 85.418        | 85.417        | 59.845                 | 59.844        | 59.843        | 10.664               | 10.663        | 10.661        |
| <b>MEAN</b>       | <b>32.567</b>          | <b>32.565</b> | <b>32.561</b> | <b>63.558</b>        | <b>63.556</b> | <b>63.554</b> | <b>51.433</b>          | <b>51.431</b> | <b>51.428</b> | <b>18.239</b>        | <b>18.237</b> | <b>18.234</b> |
